# Supplementary material for: Microwave – assisted hydrothermal synthesis of nanocrystal β-Ni(OH)2for supercapacitor applications
Source: Royal Society of Chemistry journal article supplement (doi:10.1039/c6ce00329j), 2016-01-01

**Microwave – assisted hydrothermal synthesis of Nanocrystal  $\beta$ -Ni(OH)<sub>2</sub>  
for supercapacitor application**

**Supplementary Information**

## Microwave – assisted hydrothermal synthesis of Nanocrystal $\beta$ -Ni(OH)<sub>2</sub> for supercapacitor application

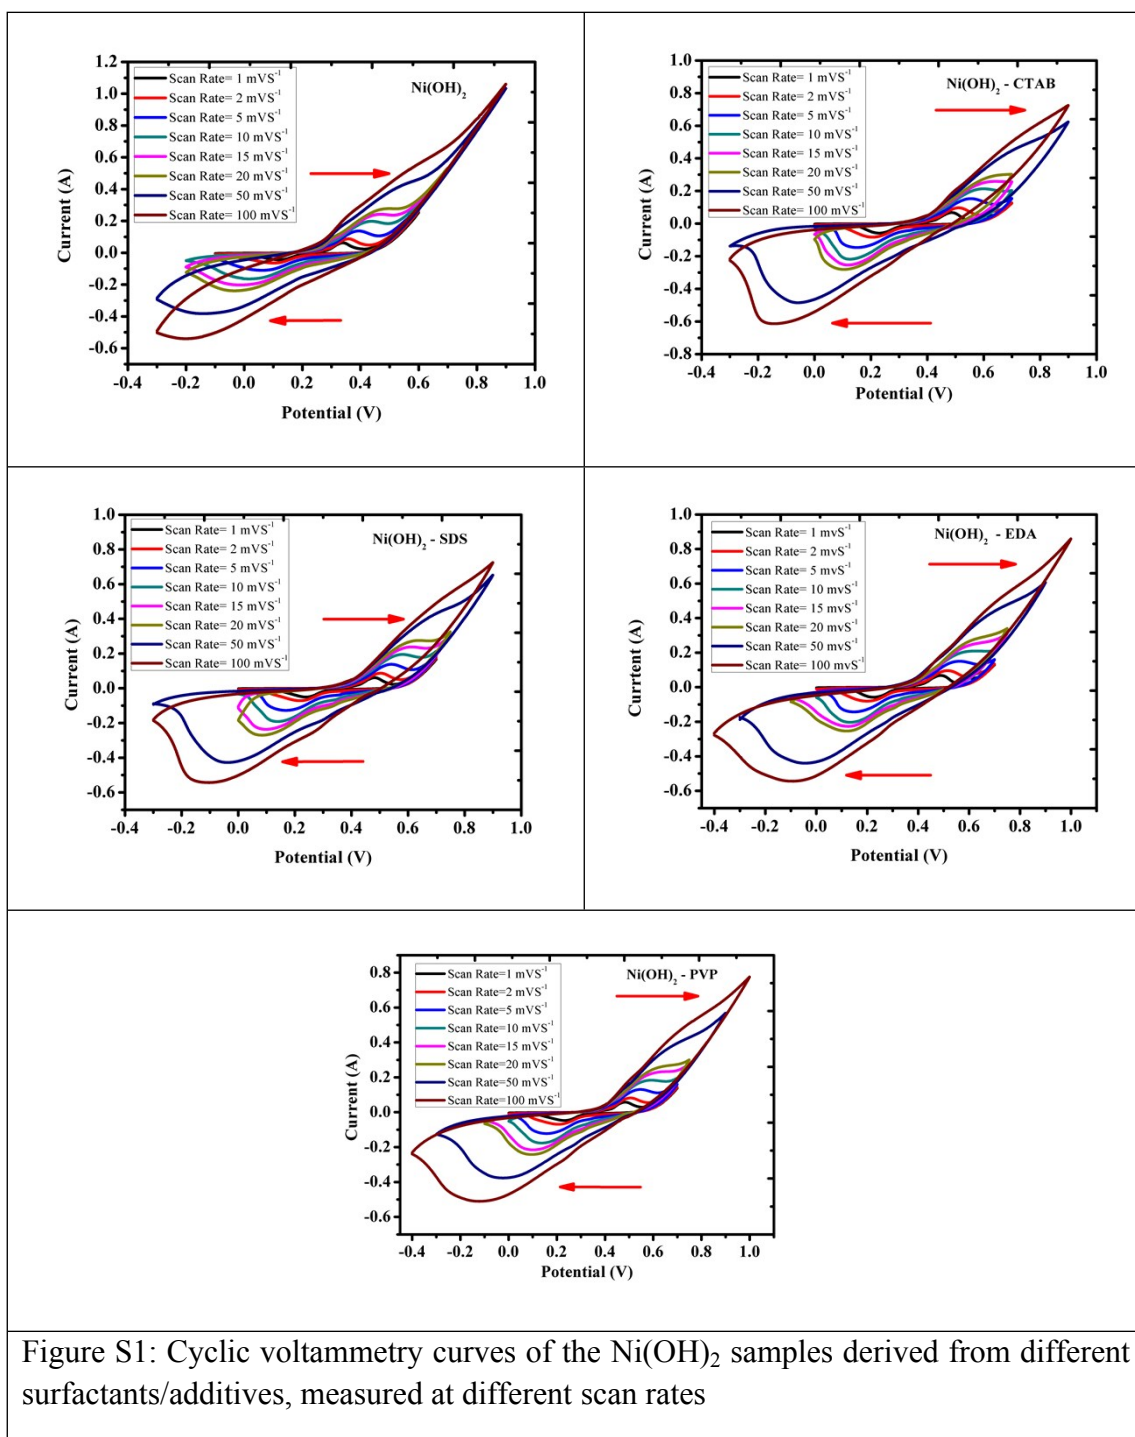

## Microwave – assisted hydrothermal synthesis of Nanocrystal $\beta$ -Ni(OH)<sub>2</sub> for supercapacitor application

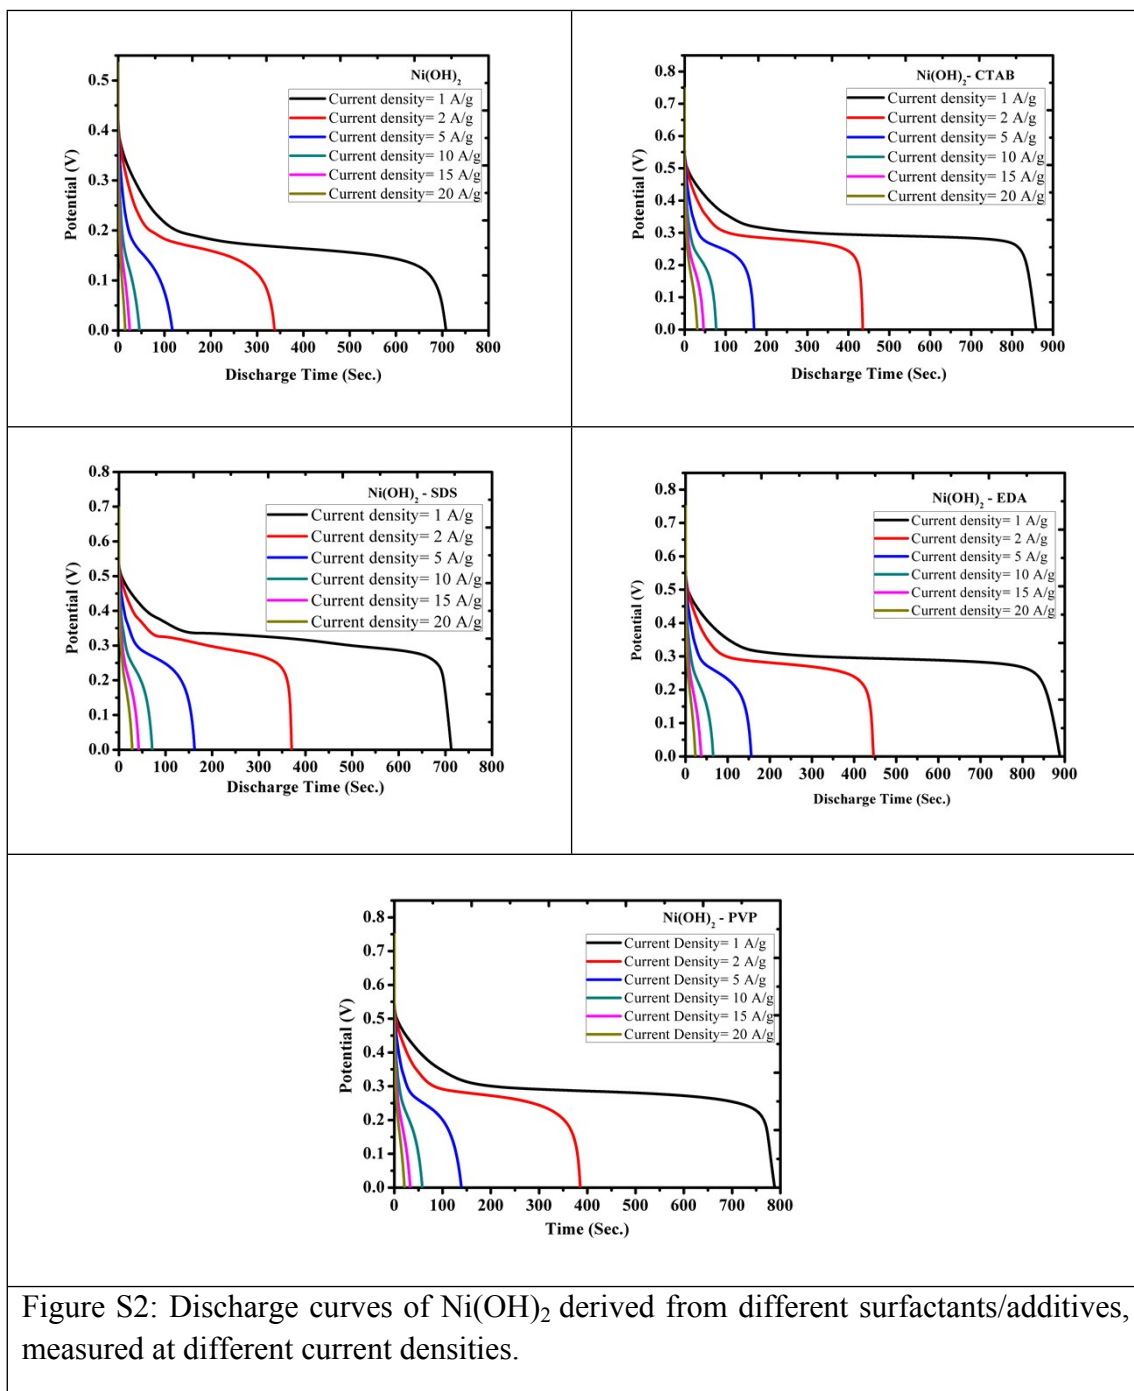

Supplement: c6ce00329j1.pdf [file c6ce00329j1.pdf]
